# Supplementary material for: Acidic Compartment Size, Positioning, and Function during Myogenesis and Their Modulation by the Wnt/Beta‐Catenin Pathway
Source: Hindawi journal article supplement (doi:10.1155/2020/6404230), 2020-01-01
Supplement: f1 [file 6404230.f1.zip]

## **Suppl. Fig. 1**

### **DES**

Des-F GAGCGTGACAACCTGCTAGA

Des-R CCACGTCAGCTCTGAAAGCA

### **Flotillin-1**

Flot1-F CGGTGGAGGAGATCTATAAGGAC

Flot1-R CCCAGAGAGTGCAGGTAGTC

### **Flotillin-2**

Flot2-F CACCCAGAGGAACCCTGACG

Flot2-R TCTCGATACCCATGCGACCC

### **GAPDH**

GAPDH-F CAGAACATCATCCCAGCGT

GAPDH-R CAGGTCAGGTCAACAACAG

### **LAMP-1**

Lamp1-F TCCTGCTCGGCTTTTTACAGG

Lamp1-R CACGAGCTGTGTGACTGTGA

### **LAMP-2**

Lamp2-F AGAATGGTTCTGTCATTTTAAGTGC

Lamp2-R GCCAACTGCGACTGGAATAA

### **Myogenin**

Miog-F AGCCTTCGAGGCTCTGAAAC

Miog-R CTGGGTGCAGCAGGTTGT
