# Supplementary material for: Acidic Compartment Size, Positioning, and Function during Myogenesis and Their Modulation by the Wnt/Beta-Catenin Pathway
Source: Biomed Res Int. 2020 Jun 20;2020:6404230. doi: 10.1155/2020/6404230 (PMC7322607; doi:10.1155/2020/6404230)
Supplement: Supplementary Materials — Supp. Fig. 1: sequences of Gallus gallus primers used in this study. [file 6404230.f1.zip]

Archive with 2 entries (2 files):
- mat.6404230.v3.pdf
- Supp Fig 1 Mermelstein_BMRI_3082499.doc
